# Supplementary material for: Defect and strain engineered MoS2/graphene catalyst for an enhanced hydrogen evolution reaction
Source: Royal Society of Chemistry journal article supplement (doi:10.1039/d2ra07363c), 2023-01-01
Supplement: d2ra07363c1.pdf [file d2ra07363c1.pdf]

## Supplementary Information

### MD simulations details of solid/liquid interfacial model

Molecular dynamics (MD) simulations were initially performed using the LAMMPS package to equilibrate the structure of water molecules at the interface of monolayer MoS<sub>2</sub>.<sup>1</sup> The rectangular supercell of monolayer MoS<sub>2</sub> had a rectangular dimension of approximately 21.545×24.878 Å<sup>2</sup> in x and y direction, respectively, and a water film initially placed on the top of the surface contained a total number of 538 H<sub>2</sub>O molecules. Periodic boundary conditions were applied in all three directions and a vacuum 5.0 nm thick was added above the water film to prevent interactions between the periodic images. We employed the flexible extended simple point charge (SPC/E) model<sup>2</sup> for the water solvent and maintained a fixed surface structure during the simulation. The employed force field for MoS<sub>2</sub> was developed by Heiranian et al.,<sup>3</sup> which has been demonstrated to reproduce excellent water-MoS<sub>2</sub> interface properties. The cutoff distance for the non-bonded interactions was set to be 10.0 Å, and the long-range electrostatic interactions were calculated using the particle-particle particle-mesh method (PPPM).<sup>4</sup> The canonical ensemble (NVT) was applied during the simulation, temperature was held at 300.0 K via the Nose–Hoover method, and the coupling coefficient was 0.1 ps. The entirety of the simulation was completed in 20.0 ns, where the first 10.0 ns was for equilibrium and the remaining 10.0 ns were used for data collection.

To determine the interface structure of water molecules at the interface of monolayer MoS<sub>2</sub>, we have tried to calculate the density distribution of water molecules along the z direction, as shown in Figure 2. It is clear from this figure that there are two pronounced peaks locating at 3.2 and 6.1 Å away from the surface, indicating that the water molecules can form two well-defined solvation structures near the surface. Beyond that, the density of water molecules along the z direction keeps almost unchanged, which means that those water molecules would behave bulk-like and their

properties would seldom influence the reactions happened at the interface of monolayer  $\text{MoS}_2$ . Therefore, the water molecules are divided into parts: (a) the interface water with the distance less than  $8.2 \text{ \AA}$  from the surface; (b) bulk water with the distance larger than  $8.2 \text{ \AA}$  from the surface, as illustrated in Figure 2. Afterwards, the interface water molecules were first extracted from the equilibrium structure and then a hexagonal cell was cleaved from the obtained structure, which was used for the subsequent DFT calculations. Additionally, it should be mentioned that, during the cleave process, the water molecule will be maintained if its mass center is inside the hexagonal cell. The dimension of the monolayer  $\text{MoS}_2$  is  $12.44 \times 12.44 \text{ \AA}^2$  and there are totally 32 water molecules on the surface.

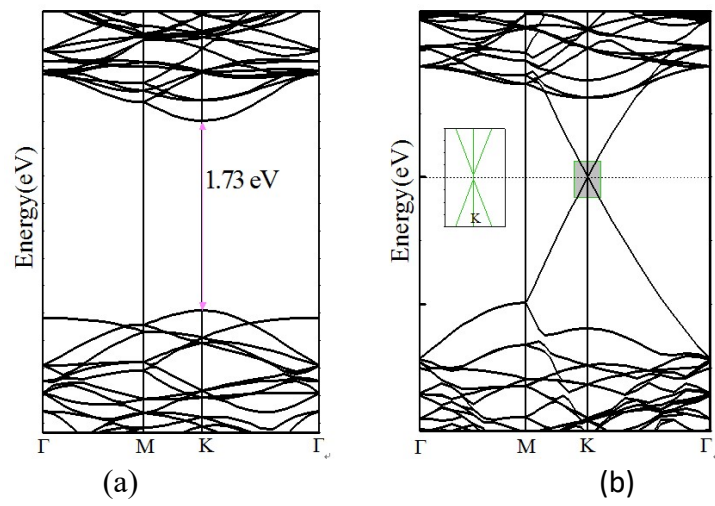

Figure 1. The band structures of monolayer MoS<sub>2</sub> (a) and hybrid MoS<sub>2</sub>/graphene (b)

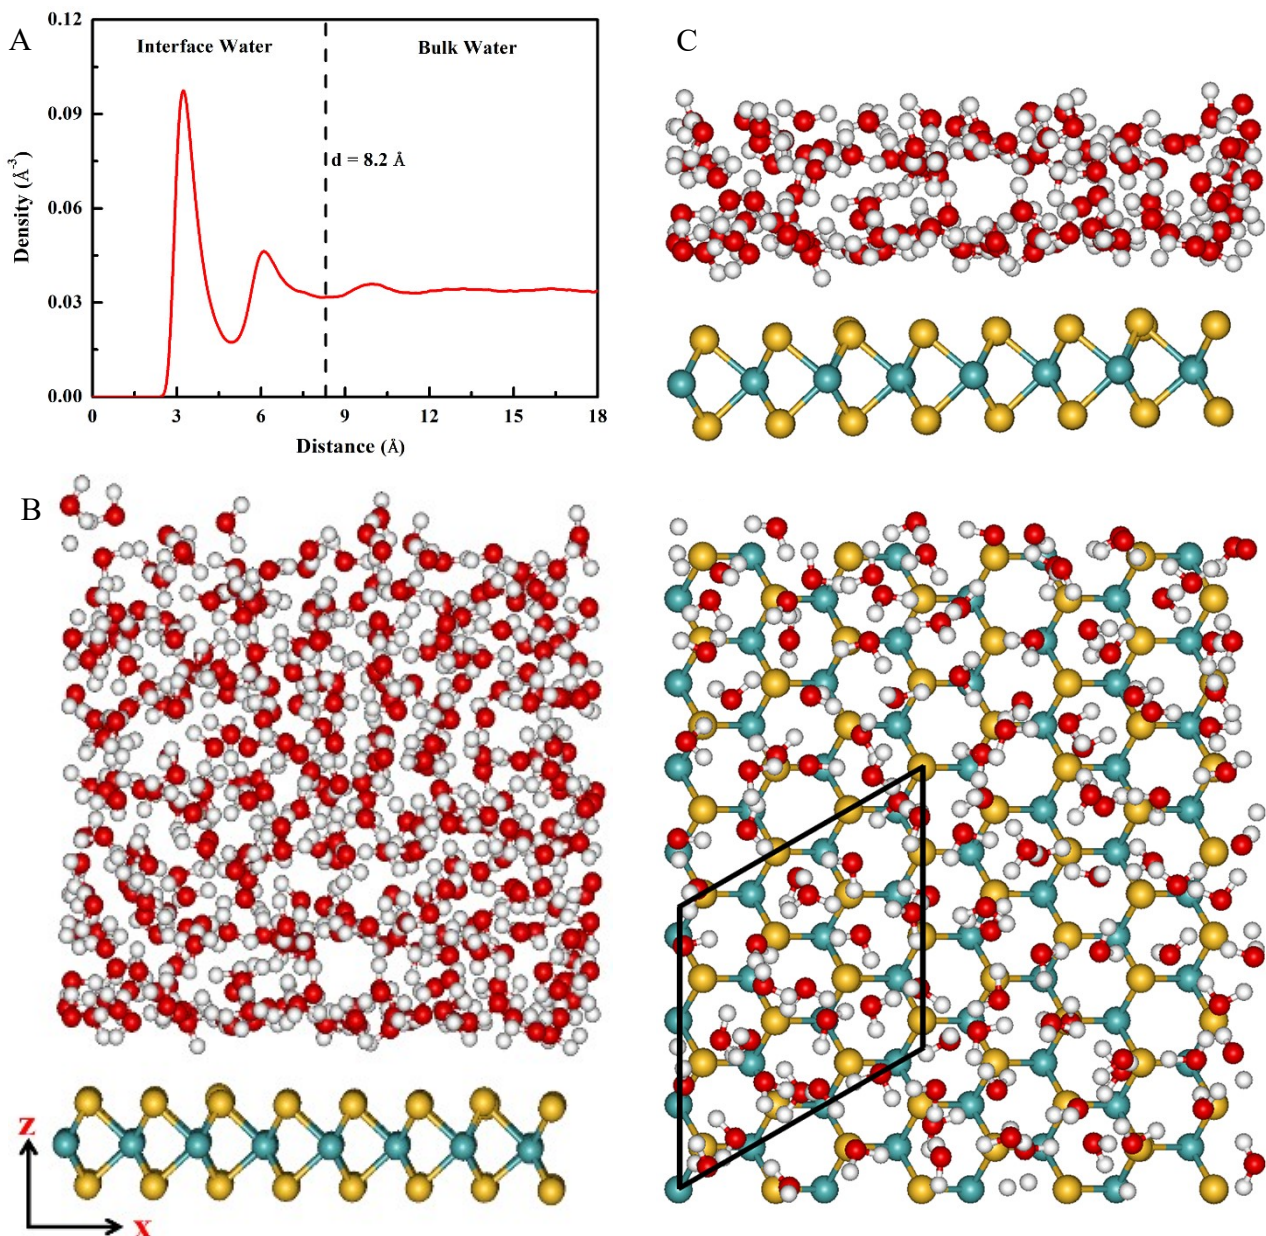

**Figure 2.** (A) Density distribution of water molecules at MoS<sub>2</sub> surface along the z-direction. (B) Equilibrium snapshot of the water molecules at the interface of monolayer MoS<sub>2</sub> surface. The surface is placed at  $d = 0.0 \text{ \AA}$ . (C) Side and Top views of interfacial water molecules at the interface of monolayer MoS<sub>2</sub> surface. The super cell labeled by the black box in C is used for DFT calculations, which includes 16 MoS<sub>2</sub> units and 32 water molecules.

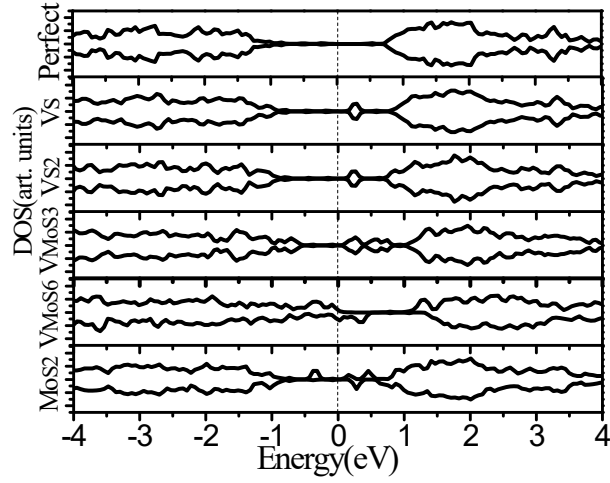

Figure 3. Total density of states (TDOS) for MoS<sub>2</sub>/graphene system with different intrinsic defects: V<sub>S</sub>, V<sub>S2</sub>, V<sub>MoS3</sub>, V<sub>MoS6</sub> and MoS<sub>2</sub>, respectively. The vertical black dashed line indicates the position of the Fermi level, taken as zero energy.

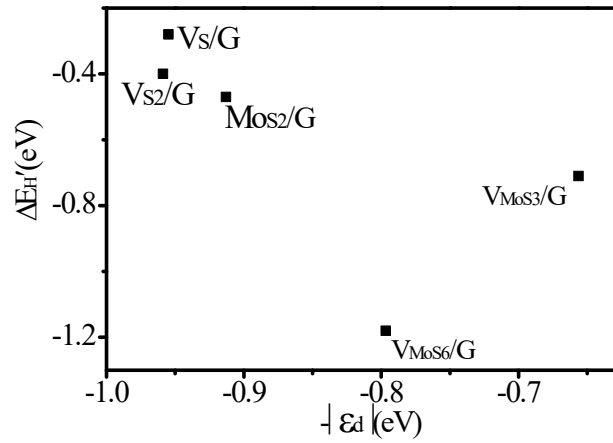

Figure 4. Relationship between  $\Delta E_{H'}$  and  $-|\epsilon_d|$  for MoS<sub>2</sub>/graphene system with different intrinsic defects: V<sub>S</sub>, V<sub>S2</sub>, V<sub>MoS3</sub>, V<sub>MoS6</sub> and MoS<sub>2</sub>, respectively.

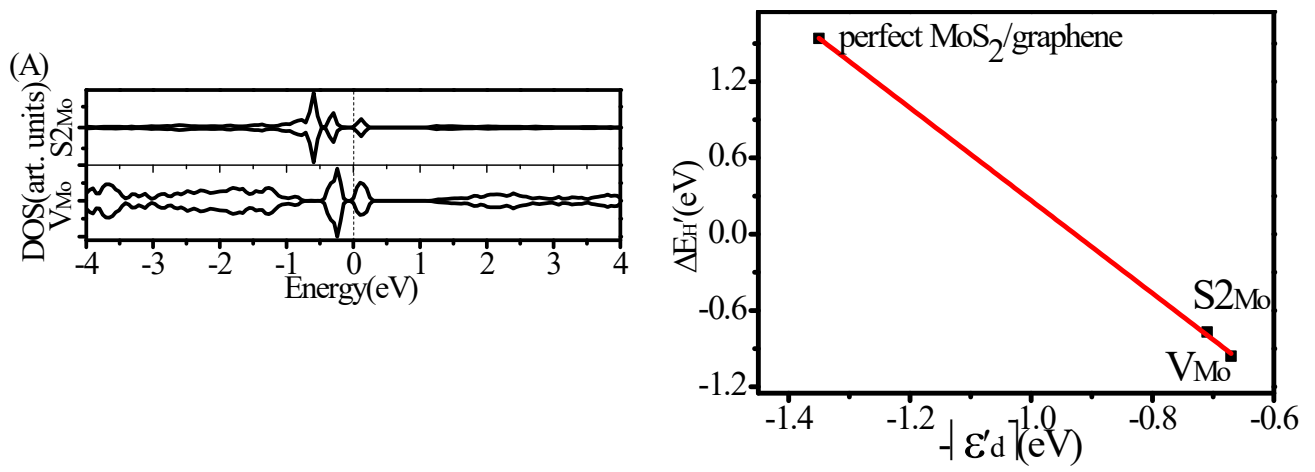

Figure 5. (A) Projected p-orbital DOS of S atoms for MoS<sub>2</sub>/graphene system with V<sub>Mo</sub> and S<sub>2Mo</sub> defects. (B) Relationship between  $\Delta E_{H'}$  and  $-|\epsilon'_d|$  for perfect MoS<sub>2</sub>/graphene and defective MoS<sub>2</sub>/graphene with V<sub>Mo</sub> and S<sub>2Mo</sub> cases.

## Reference:

- (1) LAMMPS; <http://lammps.sandia.gov>
- (2) Yuet, P. K.; Blankschtein, D. Molecular Dynamics Simulation Study of Water Surfaces: Comparison of Flexible Water Models. *J. Phys. Chem. B* 2010, 114, 13786–13795.
- (3) Heiranian, M.; Wu, Y. B.; Alurub, N. R. Molybdenum disulfide and water interaction parameters. *J. Chem. Phys.* 2017, 147, 104706.
- (4) Hockney, R. W.; Eastwood, J. W. *Computer Simulation Using Particles*, 2nd ed.; IOP: Bristol, U.K., 1988.
